# Supplementary figures and images for: CRISPR-edited DPSCs constitutively expressing BDNF enhance dentin regeneration in injured teeth
Source: eLife journal article supplement (doi:10.7554/elife.105153), 2025-03-25

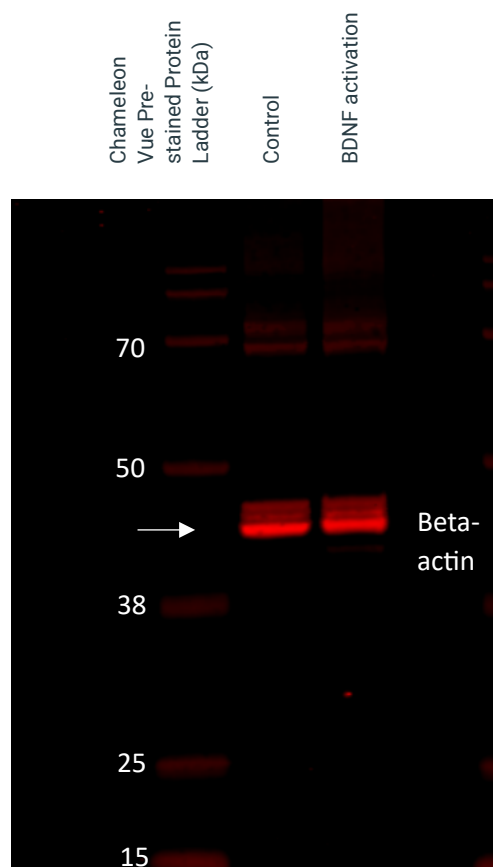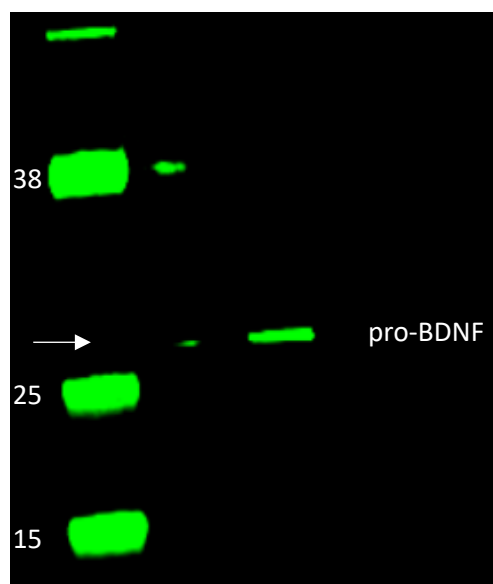

Supplement: fig4-data2 [file elife-105153-fig4-data2-v1.zip]
